# Supplementary material
Source: publisher site journal article supplement (https://www.dovepress.com/article/305486)

Supplementary Table 1. Wilcoxon and negative binomial mixed model (NBMM) analyses- mean baseline (B) (standard deviation) and absolute changes in abundance of specific taxa by chemotherapy treatment – neoadjuvant (neoADJ) versus adjuvant (ADJ) chemotherapy

| Taxa abundance         |                | Mean baseline and absolute changes in taxa abundance |                | Neoadjuvant vs Adjuvant    |                   |                |
|------------------------|----------------|------------------------------------------------------|----------------|----------------------------|-------------------|----------------|
|                        |                | Neoadjuvant (neoADJ)                                 | Adjuvant (ADJ) | Wilcoxon <sup>a</sup> Test | NBMM              |                |
|                        |                |                                                      |                |                            | No BMI adjustment | BMI Adjustment |
|                        |                | N=16                                                 | N=13           | N=29                       | N=29              | N=29           |
| p_Actinobacteria       | B              | 0.013 (0.005)                                        | 0.017 (.011)   | 0.23                       |                   |                |
| f_Micrococcaceae       | change         | -0.01 (0.003)                                        | -0.006(.013)   | 0.034                      |                   |                |
| g_Rothia               | P <sup>c</sup> | 0.008                                                | 1.00           |                            | 0.15              | 0.002          |
| p_Actinobacteria       | B              | 0.163 (.094)                                         | 0.081 (.044)   | 0.97                       |                   |                |
| f_Coriobacteriaceae    | change         | -0.043 (.102)                                        | 0.210 (.101)   | 0.35                       |                   |                |
| g_Eggerthella          | P <sup>c</sup> | 0.46                                                 | 0.049          |                            | 0.034             | 0.139          |
| p_Actinobacteria       | B              | 0.202 (0.11)                                         | 0.359 (.137)   | 0.55                       |                   |                |
| f_Coriobacteriaceae    | change         | -0.045 (0.13)                                        | 0.359(.214)    | 0.34                       |                   |                |
| g_Slackia              | P <sup>c</sup> | 0.84                                                 | 0.21           |                            | 0.022             | 0.614          |
| P_Bacteroidetes        | B              | 1.24 (0.31)                                          | 0.98 (0.36)    | 0.56                       |                   |                |
| F_Porphromonadaceae    | change         | -0.42 (0.27)                                         | 1.92 (1.57)    | 0.13                       |                   |                |
| g_Parabacteroides      | P <sup>c</sup> | 0.12                                                 | 0.31           |                            | 0.014             | 0.384          |
| P_Bacteroidetes        | B              | 8.19 (3.34)                                          | 7.78 (2.70)    | 0.74                       |                   |                |
| F_Prevotellaceae       | change         | -0.55 (4.34)                                         | -4.82 (2.73)   | 0.21                       |                   |                |
| g_Prevotella           | P <sup>c</sup> | 0.93                                                 | 0.033          |                            | 0.043             | 0.900          |
| P_Bacteroidetes        | B              | 0.003(0.003)                                         | 0.026(0.011)   | 0.02                       |                   |                |
| f_Rikenellaceae        | change         | 0.025(0.012)                                         | -0.006(0.01)   | 0.13                       |                   |                |
|                        | P <sup>c</sup> | 0.03                                                 | 0.73           |                            | 0.00019           | 0.719          |
| p_Bacteroidetes        | B              | 0.035 (0.015)                                        | 0.013(0.012)   | 0.13                       |                   |                |
| F_Rikenellaceae        | Change         | -0.032 (0.015)                                       | 0.014(0.008)   | 0.03                       |                   |                |
| g_Alistipes            | P <sup>c</sup> | 0.016                                                | 0.25           |                            | 3.3 E10-7         | 0.82           |
| P_Bacteroidetes        | B              | 0.25 (0.17)                                          | 0.35 (0.16)    | 0.89                       |                   |                |
| F_S24-7                | change         | -0.11 (0.16)                                         | -0.31(0.13)    | 0.33                       |                   |                |
| g_                     | P <sup>c</sup> | 0.91                                                 | 0.020          |                            | 0.001             | 0.007          |
| P_Bacteroidetes        | B              | 0.337 (0.145)                                        | 0.159 (0.106)  | 0.89                       |                   |                |
| F_Barnesiellaceae      | change         | 0.145 (0.148)                                        | -0.017 (0.074) | 0.15                       |                   |                |
|                        | P <sup>c</sup> | 0.28                                                 | 0.85           |                            | 0.24              | 0.007          |
| P_Bacteroidetes        | B              | 0.272 (0.092)                                        | 0.311 (0.175)  | 0.89                       |                   |                |
| F_Odoribacteraceae     | change         | 0.207 (0.158)                                        | 0.123 (0.269)  | 0.15                       |                   |                |
| g_Odoribacter          | P <sup>c</sup> | 0.22                                                 | 0.59           |                            | 0.151             | 0.004          |
| p_Euryarchaeota        | B              | 2.087 (1.78)                                         | 0.366 (0.258)  | 0.98                       |                   |                |
| f_Methanobacteriaceae] | change         | -1.428 (1.17)                                        | -0.202 (0.292) | 0.29                       |                   |                |
| g_Methanobrevibacter   | P <sup>c</sup> | 0.16                                                 | 0.74           |                            | 0.0002            | 0.00005        |
| P_Firmicutes           | B              | 0.025 (0.015)                                        | 0.025 (0.016)  | 0.34                       |                   |                |
|                        | change         | 0.021(0.018)                                         | -0.001(0.028)  | 0.034                      |                   |                |
|                        | P <sup>c</sup> | 0.25                                                 | 0.20           |                            | 0.001             | 0.047          |
| P_Firmicutes           | B              | 0.005 (0.002)                                        | 0.009 (0.003)  | 0.58                       |                   |                |
| f_Gemellaceae          | change         | 0.007 (0.006)                                        | -0.003 (0.004) | 0.51                       |                   |                |
| g_                     | P <sup>c</sup> | 0.82                                                 | 0.43           |                            | 0.005             | 0.303          |
| P_Firmicutes           | B              | 0.021 (0.016)                                        | 0.026 (0.017)  | 0.40                       |                   |                |
|                        | change         | -0.011 (0.017)                                       | -0.019 (0.018) | 0.83                       |                   |                |
|                        | P <sup>c</sup> | 0.77                                                 | 0.56           |                            | 0.005             | 0.26           |

|                       |                |                |                |       |          |          |
|-----------------------|----------------|----------------|----------------|-------|----------|----------|
| P_Firmicutes          | B              | 0.14 (0.09)    | 0.16 (0.11)    | 0.60  |          |          |
| f_Enterococaceae,     | Change         | 0.13(0.27)     | -0.12(0.09)    | 0.28  |          |          |
| g_Enterococcus        | P <sup>c</sup> | 0.92           | 0.047          |       | 0.04     | 0.16     |
| P_Firmicutes          | B              | 0.112 (0.043)  | 2.108 (1.502)  | 0.20  |          |          |
| f_Lactobacillaceae    | Change         | 0.199 (0.176)  | -0.83 (1.802)  | 0.33  |          |          |
| g_Lactobacillus       | P <sup>c</sup> | 0.38           | 0.70           |       | 0.059    | 0.70     |
| P_Firmicutes          | B              | 0.051 (0.029)  | 0.031 (0.017)  | 0.42  |          |          |
| f_Streptococccaceae,  | Change         | 0.021 (0.045)  | -0.02 (0.02)   | 0.89  |          |          |
| g_Lactococcus         | P <sup>c</sup> | 1.00           | 0.46           |       | 0.087    | 0.001    |
| P_Firmicutes          | B              | 0.003(0.002)   | 0.05(0.031)    | 0.025 |          |          |
| f_Turicibacteraceae   | change         | 0.014(0.009)   | -0.023(0.04)   | 0.054 |          |          |
| g_Turicibacter        | P <sup>c</sup> | 0.15           | 0.69           |       | 0.13     | 0.26     |
| P_Firmicutes          | B              | 0.57 (0.134)   | 0.452 (0.115)  | 0.97  |          |          |
|                       | change         | 0.05 (0.138)   | 0.331 (0.245)  | 0.67  |          |          |
|                       | P <sup>c</sup> | 0.74           | 0.22           |       | 0.486    | 0.014    |
| P_Firmicutes          | B              | 0.013 (0.01)   | 0.201 (0.18)   | 0.68  |          |          |
| f_Clostridiaceae      | change         | 0.077 (0.05)   | -0.191 (0.17)  | 0.30  |          |          |
| g_                    | P <sup>c</sup> | 0.34           | 0.69           |       | 0.00023  | 0.025    |
| P_Firmicutes          | B              | 1.313 (0.352)  | 1.34 (0.288)   | 0.97  |          |          |
| f_Lachnospiraceae     | change         | 0.026 (0.406)  | -0.007 (0.372) | 0.49  |          |          |
|                       | P <sup>c</sup> | 0.21           | 1.00           |       | 0.775    | 0.045    |
| P_Firmicutes          | B              | 0.012 (0.006)  | 0.031 (0.015)  | 0.57  |          |          |
| f_Lachnospiraceae     | change         | 0.029 (0.015)  | 0.058 (0.04)   | 0.97  |          |          |
| g_Anaerostipes        | P <sup>c</sup> | 0.07           | 0.11           |       | 0.692    | 0.011    |
| P_Firmicutes          | B              | 0.048(0.03)    | 0.032(0.03)    | 0.77  |          |          |
| f_Lachnospiraceae     | change         | -0.040(0.03)   | 0.198(0.12)    | 0.10  |          |          |
| g_Clostridium         | P <sup>c</sup> | 0.38           | 0.024          |       | 0.008    | 0.68     |
| p_Firmicutes          | B              | 1.55 (0.45)    | 1.45 (0.31)    | 0.75  |          |          |
| f_Ruminococaceae      | change         | 0.51 (0.30)    | -0.42(0.44)    | 0.078 |          |          |
| g_                    | P <sup>c</sup> | 0.14           | 0.50           |       | 0.048    | 1.00     |
| p_Firmicutes          | B              | 0.004 (0.003)  | 0.001 (0.001)  | 0.85  |          |          |
| f_Ruminococaceae      | change         | -0.001 (0.003) | 0.004 (0.003)  | 0.67  |          |          |
| g_Anaerotruncus       | P <sup>c</sup> | 0.81           | 0.31           |       | 0.075    | 2.3 E-08 |
| p_Firmicutes          | B              | 6.40 (1.02)    | 6.10 (1.14)    | 0.83  |          |          |
| f_Ruminococaceae      | change         | 1.67 (0.81)    | 2.65(1.92)     | 0.80  |          |          |
| g_Faecalibacterium    | P <sup>c</sup> | 0.044          | 0.19           |       | 0.74     | 0.601    |
| p_Firmicutes          | B              | 0.872 (0.48)   | 0.033 (0.032)  | 0.57  |          |          |
| f_Veillonellaceae     | change         | -0.41 (0.552)  | 0.626 (0.459)  | 0.30  |          |          |
| g_Acidaminococcus     | P <sup>c</sup> | 0.84           | 0.13           |       | 0.008    | 0.009    |
| p_Firmicutes          | B              | 0.678 (0.255)  | 0.471 (0.251)  | 0.68  |          |          |
| f_Veillonellaceae     | change         | -0.079 (0.298) | -0.107 (0.392) | 0.97  |          |          |
| g_Dialister           | P <sup>c</sup> | 0.90           | 0.59           |       | 0.82     | 0.00002  |
| p_Firmicutes          | B              | 0.05 (0.041)   | 0.034 (0.016)  | 0.75  |          |          |
| f_Mogibacteriaceae    | change         | 0.018 (0.04)   | -0.029 (0.016) | 0.43  |          |          |
| g_Mogibacterium       | P <sup>c</sup> | 0.69           | 0.16           |       | 0.003    | 0.074    |
| p_Firmicutes          | B              | 0.094 (0.066)  | 0.247 (0.134)  | 0.83  |          |          |
| f_Erysipelotrichaceae | change         | 0.169 (0.106)  | -0.241 (0.134) | 0.12  |          |          |
| g_Catenibacterium     | P <sup>c</sup> | 0.16           | 0.13           |       | 0.000041 | 0.874    |
| p_Firmicutes          | B              | 0.09(0.03)     | 0.80 (0.24)    | 0.09  |          |          |
| f_Erysipelotrichaceae | change         | 0.16(0.07)     | -0.57(0.23)    | 0.037 |          |          |
| g_[Eubacterium]       | P <sup>c</sup> | 0.042          | 0.020          |       | 0.000019 | 0.80     |

|                       |                |                |               |       |       |       |
|-----------------------|----------------|----------------|---------------|-------|-------|-------|
| p__Proteobacteria     | B              | 0.133(0.033)   | 0.042(0.012)  | 0.09  |       |       |
| f_Desulfovibrionaceae | change         | 0.019(0.047)   | 0.214(0.132)  | 0.032 |       |       |
| g_Bilophila           | P <sup>c</sup> | 0.50           | 0.002         |       | 0.002 | 0.044 |
| P__Proteobacteria     | B              | 0.201 (0.096)  | 0.037 (0.026) | 0.22  |       |       |
| F_Desulfovibrionaceae | change         | 0.114 (0.172)  | 0.033 (0.057) | 0.46  |       |       |
| G_Desulfovibrio       | P <sup>c</sup> | 0.63           | 0.63          |       | 0.73  | 0.001 |
| p__Proteobacteria     | B              | 0.219 (0.126)  | 0.194 (0.129) | 0.66  |       |       |
| f_Enterobacteriaceae  | change         | 0.036(0.123)   | 1.40(1.001)   | 0.49  |       |       |
| g_Escherichia         | P <sup>c</sup> | 0.044          | 0.25          |       | 0.15  | 0.17  |
| P_Verrucomicrobia     | B              | 0.976 (0.758)  | 0.042 (0.036) | 0.012 |       |       |
| f_Verrucomicrobiaceae | change         | -0.738 (0.784) | 0.370 (0.277) | 0.096 |       |       |
| g_Akkermansia         | P <sup>c</sup> | 0.45           | 0.16          |       | 0.023 | 0.30  |

<sup>a</sup> Wilcoxon rank sum (1df) comparing neoadjuvant and adjuvant groups at baseline and last collections, and in the change between last and baseline samples

<sup>b</sup> Negative binomial mixed model test in R: `glm.nb (count at gena ~ period*wtchange2 + offset(log(totreads)), random = ~ 1|SubjectID)`, Period (final vs baseline), tchange2 (increase weight vs decrease weight). Age (continuous), race (Hispanics or not Hispanics), and total number of reads were included in the model.

<sup>c</sup> Wilcoxon signed rank (1df) to test changes between last and baseline samples

Supplementary Table 2. Wilcoxon and negative binomial mixed model (NBMM) analyses, mean baseline (standard deviation) and absolute changes in relative abundance of specific taxa between groups with loss in body mass index (BMI) and gain in BMI

| Taxa abundance        |                | Mean baseline and absolute changes<br>in taxa abundance |             | BMI Loss vs BMI gain          |                                |                             |
|-----------------------|----------------|---------------------------------------------------------|-------------|-------------------------------|--------------------------------|-----------------------------|
|                       |                | BMI Loss                                                | BMI gain    | Wilcoxon <sup>a</sup><br>Test | NBMM                           |                             |
|                       |                | N=16                                                    | N=17        |                               | No chemo<br>adjustment<br>N=29 | Chemo<br>Adjustment<br>N=29 |
| p_Actinobacteria      | B              | 0(0)                                                    | 0.02(0.01)  | 0.30                          |                                |                             |
| f_Micrococcaceae      | change         | 0(0.01)                                                 | -0.02(0.01) | 0.039                         |                                |                             |
| g_Rothia              | P <sup>c</sup> | 0.70                                                    | 0.054       |                               | 0.25                           | 0.26                        |
| p_Actinobacteria      | B              | 2.75(1.05)                                              | 5.1(1.45)   | 0.11                          |                                |                             |
| f_Bifidobacteriaceae  | change         | 0.69(1.75)                                              | 2.71(2.19)  | 0.54                          |                                |                             |
| g_Bifidobacterium     | P <sup>c</sup> | 1.00                                                    | 0.35        |                               | 0.07                           | 0.44                        |
| p_Actinobacteria      | B              | 6.87(1.29)                                              | 16.15(3.51) | 0.04                          |                                |                             |
| f_Coriobacteriaceae   | change         | 0.11(1.44)                                              | -3.59(4.55) | 0.94                          |                                |                             |
| g_Collinsella         | P <sup>c</sup> | 0.93                                                    | 0.85        |                               | 0.22                           | 0.52                        |
| p_Actinobacteria      | B              | 0.22(0.1)                                               | 0.03(0.01)  | 0.66                          |                                |                             |
| f_Coriobacteriaceae   | change         | 0.02(0.14)                                              | 0.17(0.07)  | 0.14                          |                                |                             |
| g_Eggerthella         | P <sup>c</sup> | 1.00                                                    | 0.01        |                               | 0.98                           | 0.74                        |
| p_Actinobacteria      | B              | 0.28(0.14)                                              | 0.3(0.11)   | 0.85                          |                                |                             |
| f_Coriobacteriaceae   | change         | 0.03(0.08)                                              | 0.24(0.22)  | 0.21                          |                                |                             |
| g_Slackia             | P <sup>c</sup> | 0.97                                                    | 0.24        |                               | 0.44                           | 0.49                        |
| P Bacteroidetes       | B              | 5.58(2.25)                                              | 8.42(3.19)  | 0.93                          |                                |                             |
| f_Prevotellaceae      | change         | -0.41(2.59)                                             | -3.7(3.89)  | 0.11                          |                                |                             |
| g_Prevotella          | P <sup>c</sup> | 0.86                                                    | 0.04        |                               | 0.80                           | 0.045                       |
| p_Bacteroidetes       | B              | 0.01(0.01)                                              | 0.01(0.01)  | 0.81                          |                                |                             |
| f_Rikenellaceae       | change         | 0.01(0.01)                                              | 0.01(0.01)  | 0.85                          |                                |                             |
|                       | P <sup>c</sup> | 0.46                                                    | 0.11        |                               | 0.54                           | 0.15                        |
| p_Bacteroidetes       | B              | 0.03(0.01)                                              | 0.02(0.01)  | 0.48                          |                                |                             |
| f_Rikenellaceae       | change         | -0.02(0.01)                                             | -0.01(0.01) | 0.20                          |                                |                             |
| g_Alistipes           | P <sup>c</sup> | 0.22                                                    | 0.69        |                               | 0.66                           | 0.56                        |
| P Bacteroidetes       | B              | 0.38(0.17)                                              | 0.15(0.11)  | 0.10                          |                                |                             |
| f_S24-7               | change         | -0.26(0.17)                                             | -0.09(0.09) | 0.85                          |                                |                             |
| g_                    | P <sup>c</sup> | 0.23                                                    | 0.38        |                               | 0.20                           | 0.03                        |
| p_Bacteroidetes       | B              | 0.10(0.06)                                              | 0.41(0.15)  | 0.30                          |                                |                             |
| f_Barnesiellaceae     | change         | 0.03(0.05)                                              | 0.07(0.15)  | 0.94                          |                                |                             |
| g_                    | P <sup>c</sup> | 0.70                                                    | 0.84        |                               | 0.78                           | 0.99                        |
| p_Bacteroidetes       | B              | 0.3(0.17)                                               | 0.08(0.04)  | 0.12                          |                                |                             |
| f_Odoribacteraceae    | change         | -0.25(0.18)                                             | 0.01(0.07)  | 0.33                          |                                |                             |
| g_Butyricimonas       | P <sup>c</sup> | 0.17                                                    | 0.82        |                               | 0.55                           | 0.35                        |
| p_Euryarchaeota       | B              | 2.5(1.77)                                               | 0.06(0.06)  | 0.006                         |                                |                             |
| f_Methanobacteriaceae | change         | -1.43(1.2)                                              | 0(0.08)     | 0.21                          |                                |                             |
| g_Methanobrevibacter  | P <sup>c</sup> | 0.30                                                    | 0.56        |                               | 0.008                          | 0.52                        |
| p_Firmicutes          | B              | 0.04(0.02)                                              | 0.01(0)     | 0.11                          |                                |                             |
|                       | change         | 0.02(0.03)                                              | 0(0)        | 0.34                          |                                |                             |
|                       | P <sup>c</sup> | 0.38                                                    | 0.31        |                               | 0.038                          | 0.16                        |
| p_Firmicutes          | B              | 0.01(0)                                                 | 0.01(0)     | 0.66                          |                                |                             |
| f_Gemellaceae         | change         | 0.01(0.01)                                              | 0(0)        | 0.94                          |                                |                             |
| g_                    | P <sup>c</sup> | 0.97                                                    | 0.64        |                               | 0.19                           | 0.18                        |
| P_Firmicutes          | B              | 0.06(0.04)                                              | 0.21(0.11)  | 0.40                          |                                |                             |
| f_Enterococcaceae     | change         | 0(0.03)                                                 | 0.03(0.26)  | 0.18                          |                                |                             |
| g_Enterococcus        | P <sup>c</sup> | 0.85                                                    | 0.19        |                               | 0.43                           | 0.93                        |

|                                      |                |             |             |       |       |       |
|--------------------------------------|----------------|-------------|-------------|-------|-------|-------|
| p__Firmicutes                        | B              | 0.17(0.08)  | 1.56(1.16)  | 0.96  |       |       |
| f__Lactobacillaceae                  | change         | 0.53(0.34)  | -0.92(1.32) | 0.24  |       |       |
| g__Lactobacillus                     | P <sup>c</sup> | 0.28        | 0.52        |       | 0.23  | 0.02  |
| p__Firmicutes                        | B              | 0.05(0.03)  | 0.04(0.02)  | 0.47  |       |       |
| f__Streptococcaceae                  | change         | 0.04(0.04)  | -0.04(0.02) | 0.46  |       |       |
| g__Lactococcus                       | P <sup>c</sup> | 0.97        | 0.11        |       | 0.002 | 0.64  |
| P__Firmicutes                        | B              | 0.08(0.04)  | 0.01(0)     | 0.90  |       |       |
| f__Turicibacteraceae                 | change         | -0.06(0.04) | 0.03(0.02)  | 0.21  |       |       |
| g__Turicibacter                      | P <sup>c</sup> | 0.20        | 0.23        |       | 0.21  | 0.19  |
| p__Firmicutes                        | B              | 0.64(0.36)  | 0.04(0.03)  | 0.03  |       |       |
| f__Christensenellaceae               | change         | -0.39(0.3)  | -0.02(0.03) | 0.47  |       |       |
| g__                                  | P <sup>c</sup> | 1.00        | 0.84        |       | 0.65  | 0.21  |
| p__Firmicutes                        | B              | 0.17(0.14)  | 0.02(0.02)  | 0.57  |       |       |
| f__Clostridiaceae                    | change         | -0.07(0.15) | -0.01(0.02) | 0.46  |       |       |
| g__                                  | P <sup>c</sup> | 0.57        | 0.91        |       | 0.42  | 0.57  |
| p__Firmicutes                        | B              | 1.06(0.59)  | 0.55(0.32)  | 0.97  |       |       |
| f__Clostridiaceae                    | change         | -0.55(0.57) | -0.15(0.36) | 0.83  |       |       |
| g__Clostridium                       | P <sup>c</sup> | 0.90        | 0.86        |       | 0.56  | 0.55  |
| p__Firmicutes                        | B              | 0.01(0)     | 0.01(0.01)  | 0.98  |       |       |
| f__Dehalobacteriaceae                | change         | 0(0)        | -0.01(0)    | 0.04  |       |       |
| g__Dehalobacterium                   | P <sup>c</sup> | 0.74        | 0.03        |       | 0.10  | 0.53  |
| p__Firmicutes,<br>f__Lachnospiraceae | B              | 1.4(0.28)   | 1.21(0.32)  | 0.37  |       |       |
|                                      | change         | 0.28(0.3)   | -0.33(0.39) | 0.47  |       |       |
|                                      | P <sup>c</sup> | 0.38        | 1.00        |       | 0.22  | 0.31  |
| p__Firmicutes                        | B              | 0.03(0.02)  | 0.03(0.01)  | 0.48  |       |       |
| f__Lachnospiraceae                   | change         | 0.01(0.02)  | 0.06(0.03)  | 0.20  |       |       |
| g__Anaerostipes                      | P <sup>c</sup> | 0.56        | 0.04        |       | 0.18  | 0.45  |
| p__Firmicutes                        | B              | 7.24(1.9)   | 3.52(0.82)  | 0.16  |       |       |
| f__Lachnospiraceae                   | change         | -0.57(2.79) | -0.19(1.02) | 0.28  |       |       |
| g__Blautia                           | P <sup>c</sup> | 0.38        | 0.75        |       | 0.12  | 0.80  |
| p__Firmicutes                        | B              | 0.02(0.01)  | 0.05(0.03)  | 0.813 |       |       |
| f__Lachnospiraceae                   | change         | 0.14(0.08)  | -0.05(0.03) | 0.007 |       |       |
| g__Lachnobacterium                   | P <sup>c</sup> | 0.02        | 0.10        |       | 0.002 | 0.006 |
| p__Firmicutes                        | B              | 0.51(0.14)  | 0.81(0.30)  | 0.66  |       |       |
| f__Lachnospiraceae                   | change         | 0.46(0.26)  | 0.26(0.26)  | 0.75  |       |       |
| g__lachnospira                       | P <sup>c</sup> | 0.07        | 0.31        |       | 0.45  | 0.46  |
| p__Firmicutes                        | B              | 2.13(0.51)  | 0.91(0.18)  | 0.04  |       |       |
| f__Ruminococcaceae                   | change         | -0.02(0.62) | 0.25(0.3)   | 0.19  |       |       |
| g__Oscillospira                      | P <sup>c</sup> | 0.63        | 0.43        |       | 0.07  | 0.34  |
| p__Firmicutes                        | B              | 0.08(0.04)  | 0.01(0)     | 0.13  |       |       |
| f__Erysipelotrichaceae               | change         | -0.06(0.04) | 0.03(0.02)  | 0.03  |       |       |
| g__Clostridium                       | P <sup>c</sup> | 0.16        | 0.41        |       | 0.49  | 0.62  |
| p__Firmicutes                        | B              | 0.01(0.01)  | 0(0)        | 0.04  |       |       |
| f__Erysipelotrichaceae               | change         | -0.01(0.01) | 0(0)        | 0.07  |       |       |
| g__Holdemania                        | P <sup>c</sup> | 0.16        | 0.15        |       | 0.56  | 0.59  |

|                        |                |            |            |       |       |      |
|------------------------|----------------|------------|------------|-------|-------|------|
| p__Firmicutes          | B              | 0.24(0.11) | 0.49(0.19) | 0.912 |       |      |
| f__Erysipelotrichaceae | change         | 0.08(0.06) | -0.33(0.2) | 0.009 |       |      |
| g__[Eubacterium]       | P <sup>c</sup> | 0.09       | 0.11       |       | 0.44  | 0.12 |
| p__Proteobacteria      | B              | 0.25(0.1)  | 0.02(0.02) | 0.006 |       |      |
| f__Desulfovibrionaceae | change         | 0.15(0.17) | 0.01(0.03) | 0.80  |       |      |
| g__Desulfovibrio       | P <sup>c</sup> | 0.76       | 0.88       |       | 0.006 | 0.61 |
| p__Proteobacteria      | B              | 0.16(0.11) | 0.54(0.3)  | 0.04  |       |      |
| f__Pasteurellaceae     | change         | 0.1(0.13)  | -0.45(0.3) | 0.05  |       |      |
| g__Haemophilus         | P <sup>c</sup> | 0.11       | 0.25       |       | 0.09  | 0.38 |
| p__Verrucomicrobia     | B              | 0.96(0.76) | 0.04(0.02) | 0.51  |       |      |
| f__Verrucomicrobiaceae | change         | -0.63(0.8) | 0.32(0.21) | 0.51  |       |      |
| g__Akkermansia         | P <sup>c</sup> | 0.85       | 0.27       |       | 0.86  | 0.19 |

<sup>a</sup> Wilcoxon rank sum (1df) comparing BMI loss and BMI gain groups at baseline and last collections, and in the change between last and baseline samples

<sup>b</sup> Negative binomial mixed model test in R: `glm.nb(count at gena ~ period*wtchemo + offset(log(totreads)), random = ~ 1|SubjectID)`, Period (final vs baseline), tchange2 (adjuvant chemo vs neoadjuvant). Age (continuous), race (Hispanics or not Hispanics), and total number of reads were included in the model.

<sup>c</sup> Wilcoxon signed rank (1df) to test changes between last and baseline samples

# Supplementary Figure 1. Beta-diversity of 33 Breast Cancer Patients - Neoadjuvant vs Non-neoadjuvant groups (Panel A and B), Weight Loss vs Weight Gain groups (Panel C and D) between Baseline and Final Fecal Sample Collections

- Panel A, Baseline (p=0.61)

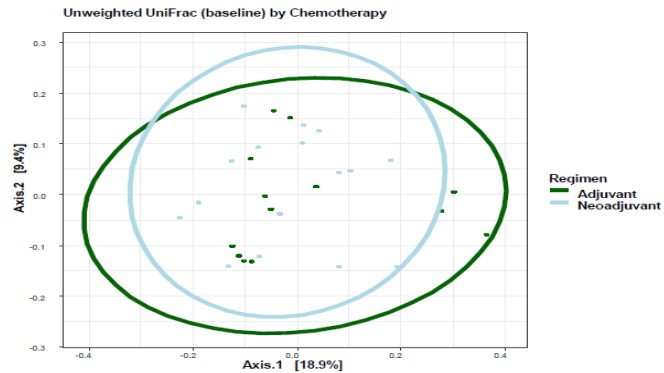

- Panel B, Final (p=0.94)

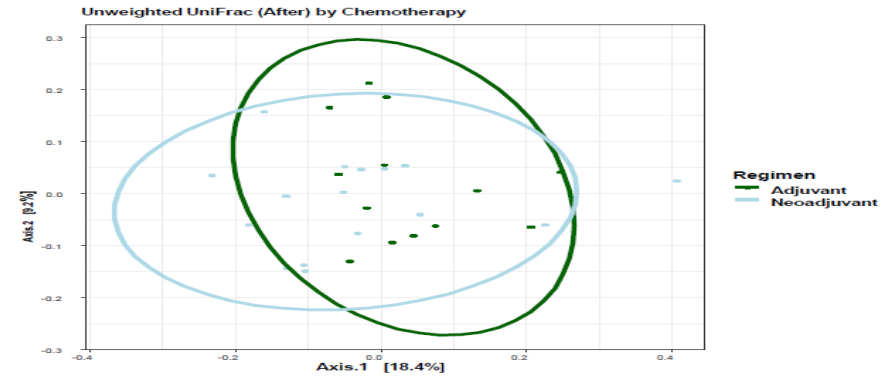

- Panel C, Baseline (p=0.62)

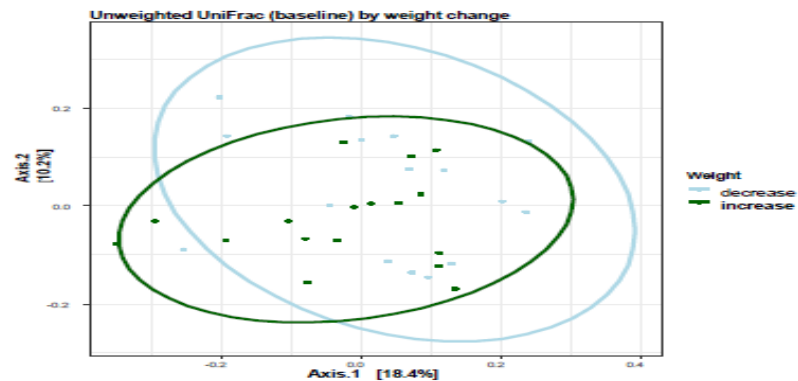

- Panel D, Final (p=0.17)

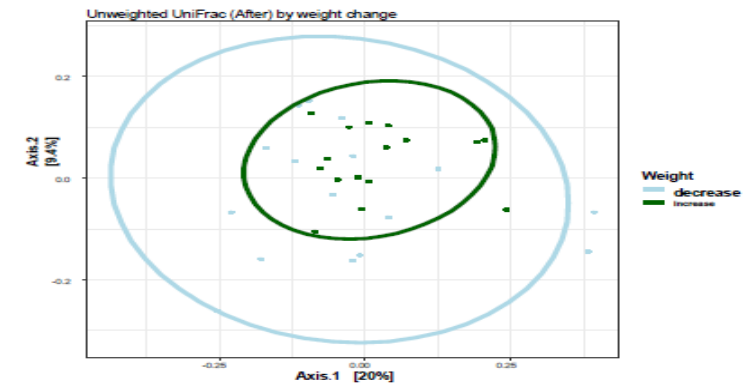

Supplement: Supplementary file 1 [file get_supplementary_file.php]
